# Supplementary material
Source: PubMed Central journal article supplement (PMC4175662)
Supplement: 11606_2014_2912_MOESM1_ESM.pdf [file 11606_2014_2912_MOESM1_ESM.pdf]

# 1.

Thank you for participating in the following brief survey regarding ACGME Duty Hours Regulations. The study is intended for research purposes and has been approved by the Rhode Island Hospital Institutional Review Board. Please note:

- Your participation is voluntary
- You may refuse to respond to any questions or quit the survey at any time
- There are no risks to completing this survey, your responses are totally anonymous

If you have any questions or concerns please address them to Brian Drolet (bdrolet@lifespan.org).

## 2. Survey

### 1. Gender

- Male  Female

### 2. Age

- <40  41-60  >60

### 3. Specialty

- Internal Medicine  Pediatrics  Surgery

### 4. Years as a program director

- 0-5  6-10  11-15  16-20  >20

### 5. Total number of residents in your program

- <10  10-29  30-49  50-79  >80

### 6. Primary training site affiliation

- Academic Medical Center  Community-Based  VA or Military

### 7. Regarding the ACGME Common Program Requirements, please indicate your level of approval:

|                                             | Disapprove            | Neutral               | Approve               |
|---------------------------------------------|-----------------------|-----------------------|-----------------------|
| Direct supervision of PGY1                  | <input type="radio"/> | <input type="radio"/> | <input type="radio"/> |
| 80 hour work week                           | <input type="radio"/> | <input type="radio"/> | <input type="radio"/> |
| 1 day off in 7                              | <input type="radio"/> | <input type="radio"/> | <input type="radio"/> |
| 16 hour PGY1 shifts                         | <input type="radio"/> | <input type="radio"/> | <input type="radio"/> |
| 24+4 hour senior resident shifts            | <input type="radio"/> | <input type="radio"/> | <input type="radio"/> |
| 8 hours off between shifts                  | <input type="radio"/> | <input type="radio"/> | <input type="radio"/> |
| Night shift frequency (<7 consecutive days) | <input type="radio"/> | <input type="radio"/> | <input type="radio"/> |
| OVERALL IMPRESSION                          | <input type="radio"/> | <input type="radio"/> | <input type="radio"/> |

**8. In general, how compliant are your residents with these ACGME duty hour regulations?**

- Never (0%)       Rarely (25%)       Sometimes (50%)       Mostly (75%)       Always (100%)

**9. How have the following been impacted by the 2011 ACGME Common Program Requirements:**

|                                            | Worse                 | Unchanged             | Improved              |
|--------------------------------------------|-----------------------|-----------------------|-----------------------|
| Patient safety                             | <input type="radio"/> | <input type="radio"/> | <input type="radio"/> |
| Quality of patient care                    | <input type="radio"/> | <input type="radio"/> | <input type="radio"/> |
| Resident education                         | <input type="radio"/> | <input type="radio"/> | <input type="radio"/> |
| Resident board/in-service scores           | <input type="radio"/> | <input type="radio"/> | <input type="radio"/> |
| Resident quality of life                   | <input type="radio"/> | <input type="radio"/> | <input type="radio"/> |
| Resident fatigue                           | <input type="radio"/> | <input type="radio"/> | <input type="radio"/> |
| Resident preparation for more senior roles | <input type="radio"/> | <input type="radio"/> | <input type="radio"/> |
| Education vs service balance               | <input type="radio"/> | <input type="radio"/> | <input type="radio"/> |
| Resident ownership of patients             | <input type="radio"/> | <input type="radio"/> | <input type="radio"/> |
| Continuity of care                         | <input type="radio"/> | <input type="radio"/> | <input type="radio"/> |

**10. How have the following been impacted by the 2011 ACGME Common Program Requirements:**

|                                          | Decreased             | Unchanged             | Increased             |
|------------------------------------------|-----------------------|-----------------------|-----------------------|
| Number of patient's seen/operative cases | <input type="radio"/> | <input type="radio"/> | <input type="radio"/> |
| Supervision of residents                 | <input type="radio"/> | <input type="radio"/> | <input type="radio"/> |
| Frequency of hand-offs/signout           | <input type="radio"/> | <input type="radio"/> | <input type="radio"/> |
| Program director workload                | <input type="radio"/> | <input type="radio"/> | <input type="radio"/> |
| Physician extender (NP, PA) coverage     | <input type="radio"/> | <input type="radio"/> | <input type="radio"/> |

**11. Please indicate your level of agreement:**

|                                             | Agree                 | Neutral               | Disagree              |
|---------------------------------------------|-----------------------|-----------------------|-----------------------|
| Length of training should be increased      | <input type="radio"/> | <input type="radio"/> | <input type="radio"/> |
| There should be fewer duty hour regulations | <input type="radio"/> | <input type="radio"/> | <input type="radio"/> |

**12. Please provide any additional comments**
